# Supplementary material for: The Post-Storage Performance of RBCs from Beta-Thalassemia Trait Donors Is Related to Their Storability Profile
Source: MDPI journal article supplement (doi:10.3390/ijms222212281), 2021-11-13
Supplement: s1 [file s1]

Table S1. Storage differences in physiological parameters between control and  $\beta$ Thal<sup>+</sup> red blood cells (RBCs)

| Parameters                                          | Day 7       |                           | Day 21      |                           | Day 42      |                           |
|-----------------------------------------------------|-------------|---------------------------|-------------|---------------------------|-------------|---------------------------|
|                                                     | Control     | $\beta$ Thal <sup>+</sup> | Control     | $\beta$ Thal <sup>+</sup> | Control     | $\beta$ Thal <sup>+</sup> |
| Storage Hemolysis<br>(mg Hb/dL)                     | 10.47±3.78  | 8.70±2.24                 | 22.8±4.70   | 17.10±3.67*               | 37.22±7.69  | 25.66±5.61*               |
| Osmotic Hemolysis<br>(% NaCl)                       | 0.443±0.011 | 0.381±0.029*              | 0.474±0.010 | 0.408±0.036*              | 0.480±0.019 | 0.409±0.032*              |
| Mechanical Hemolysis<br>(%)                         | 1.025±0.190 | 0.623±0.147*              | 1.148±0.195 | 0.756±0.082*              | 1.302±0.181 | 0.977±0.146*              |
| Oxidative Hemolysis<br>(mg Hb/dL)                   | 14.57±3.85  | 13.26±3.39                | 29.88±7.42  | 19.34±6.50*               | 48.60±12.53 | 29.93±8.81*               |
| Extracellular TAC<br>( $\mu$ M Fe <sup>2+</sup> )   | 418±60      | 523±95*                   | 392±36      | 472±103                   | 355±52      | 380±63                    |
| Extracellular UAdAC<br>( $\mu$ M Fe <sup>2+</sup> ) | 239±29      | 358±69*                   | 231±38      | 296±51*                   | 161±45      | 155±64                    |
| Extracellular UAiAC<br>( $\mu$ M Fe <sup>2+</sup> ) | 178±59      | 165±48                    | 161±34      | 176±96                    | 194±39      | 235±35                    |
| Intrinsic ROS<br>(RFU/mg of protein)                | 980±201     | 840±133                   | 1084±102    | 942±110*                  | 870±145     | 694±72*                   |
| tBHP-induced ROS<br>(RFU/mg of protein)             | 3043±964    | 2520±832                  | 3994±1217   | 2987±1233                 | 2435±571    | 2112±610                  |
| Diamide-induced ROS<br>(RFU/mg of protein)          | 2067±612    | 1888±679                  | 2198±621    | 1983±633                  | 1933±688    | 1463±591                  |
| PHZ-induced ROS<br>(RFU/mg of protein)              | 15751±5380  | 18152±5552                | 16492±4238  | 16713±3425                | 14211±5344  | 15407±6125                |
| Lipid Peroxidation<br>( $\mu$ M TBA/ mL RBC)        | 35.16±5.26  | 30.57±3.19                | 43.32±6.04  | 36.10±4.58*               | 48.41±5.12  | 41.30±5.16*               |

Data are presented as mean±SD. (\*) p<0.05. TAC: total antioxidant capacity; UAdAC: uric acid-dependent antioxidant capacity; UAiAC: uric acid-independent antioxidant capacity; ROS: reactive oxygen species; RFU: relative fluorescence units; tBHP: tert-butyl hydroperoxide; PHZ: phenylhydrazine; TBA: thiobarbituric acid
