# Supplementary material for: The Post-Storage Performance of RBCs from Beta-Thalassemia Trait Donors Is Related to Their Storability Profile
Source: MDPI journal article supplement (doi:10.3390/ijms222212281), 2021-11-13
Supplement: s1 [file s1]

Table S2. Post-transfusion recovery differences between control and  $\beta$ Thal<sup>+</sup> red blood cells (RBCs) with reverse dying.

|                           | Freshly drawn RBCs |                           | Early storage |                           | Late storage |                           |
|---------------------------|--------------------|---------------------------|---------------|---------------------------|--------------|---------------------------|
|                           | Control            | $\beta$ Thal <sup>+</sup> | Control       | $\beta$ Thal <sup>+</sup> | Control      | $\beta$ Thal <sup>+</sup> |
| Recovery in C57BL/6J mice | 4.36±1.32          | 5.59±1.06                 | 4.83±0.89     | 5.96±1.19*                | 4.10±0.82    | 5.05±1.22                 |
| (%)                       | p=0.059            |                           | p=0.049       |                           | p=0.091      |                           |
| Recovery in NOD/SCID mice | 6.26±0.97          | 7.03±1.35                 | 6.27±1.08     | 7.29±0.91                 | 5.43±1.30    | 6.53±1.33                 |
| (%)                       | p=0.224            |                           | p=0.085       |                           | p=0.116      |                           |

Data are presented as mean±SD. (\*) p<0.05.
