# Supplementary material for: The Post-Storage Performance of RBCs from Beta-Thalassemia Trait Donors Is Related to Their Storability Profile
Source: MDPI journal article supplement (doi:10.3390/ijms222212281), 2021-11-13
Supplement: s1 [file s1]

Figure S1  
A. Control Plasma

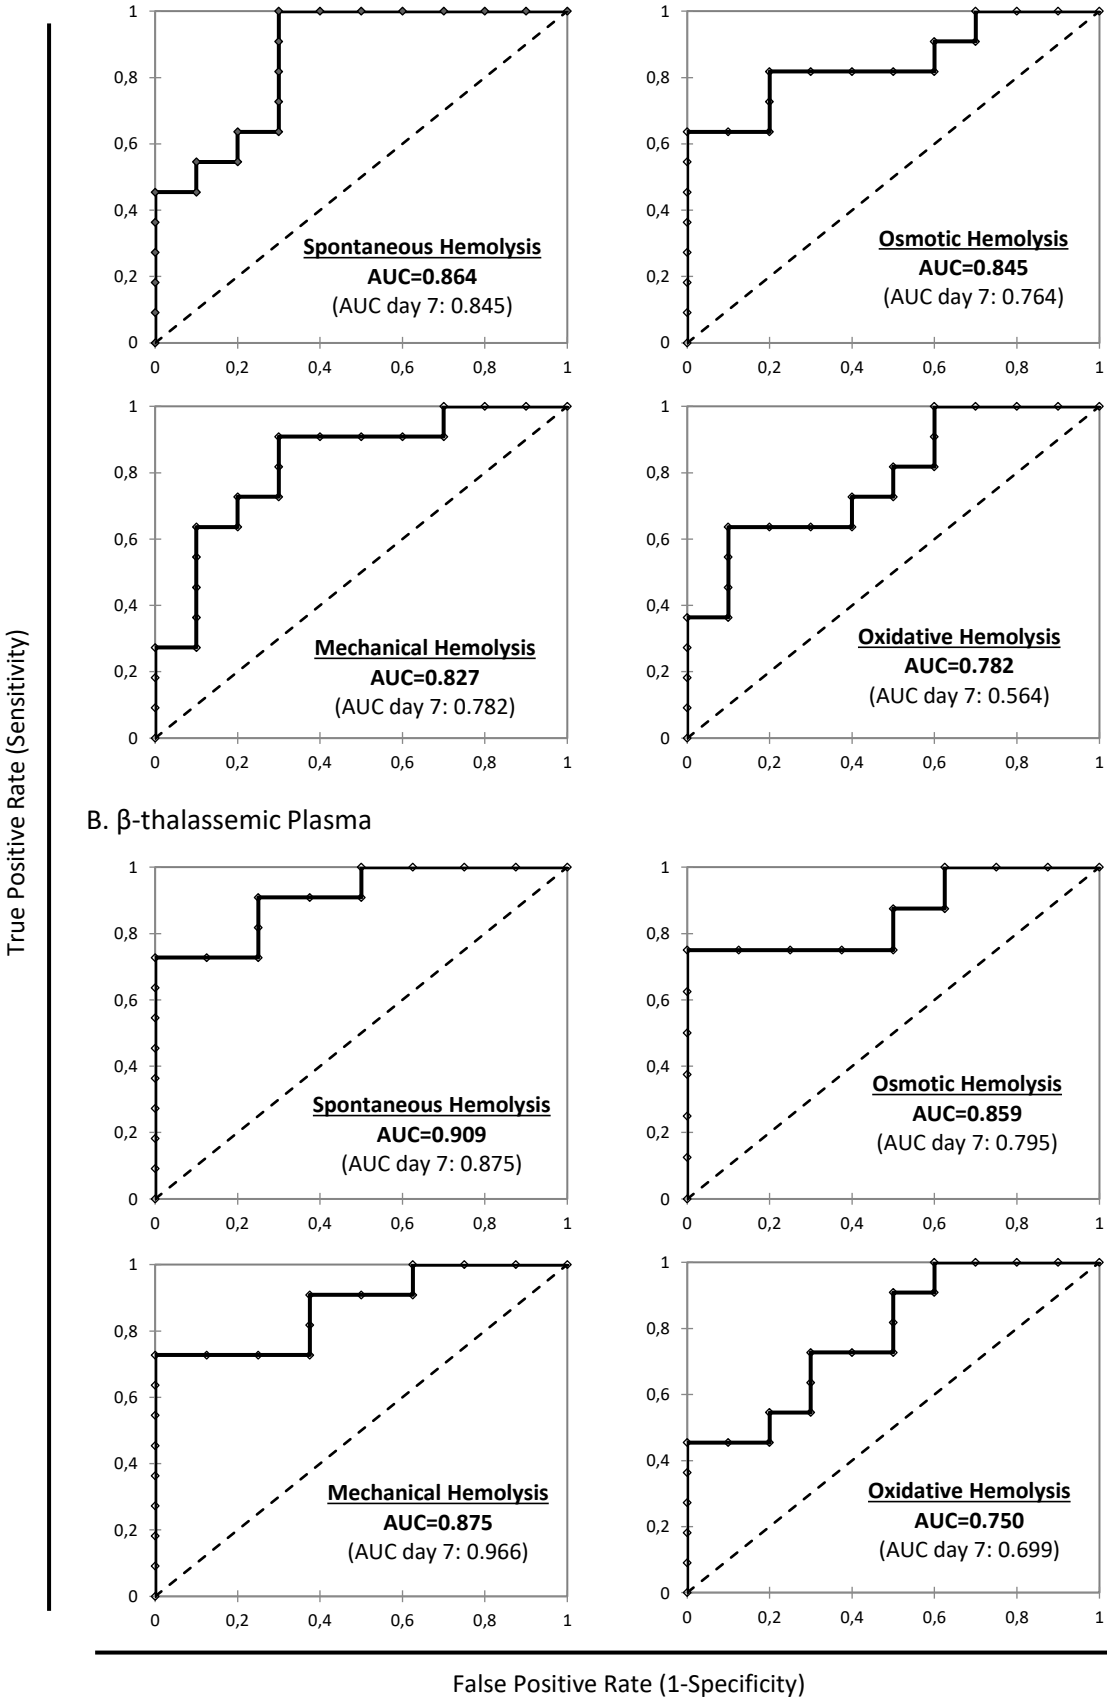

**Figure S1.** Receiver operating characteristic (ROC) curves that distinguish beta-thalassaemia minor ( $\beta$ Thal<sup>+</sup>) reconstituted RBCs. ROC curves for hemolysis parameters post reconstitution of stored RBCs in (A) control and (B)  $\beta$ -thalassemic major plasma. Only curves for late storage are shown; similar statistically significant results were observed for early storage, except for oxidative hemolysis. AUC: area under the curve.
