# Supplementary material for: The Post-Storage Performance of RBCs from Beta-Thalassemia Trait Donors Is Related to Their Storability Profile
Source: Int J Mol Sci. 2021 Nov 13;22(22):12281. doi: 10.3390/ijms222212281 (PMC8619127; doi:10.3390/ijms222212281)
Supplement: Supplementary file 1 [file ijms-22-12281-s001.zip]

Archive with 4 entries (4 files):
- Supplementary_Methods.pdf
- Table S1.pdf
- Table S2.pdf
- Figure S1.pdf
